# Supplementary material for: Circular RNA circPDE4D Protects against Osteoarthritis by Binding to miR-103a-3p and Regulating FGF18
Source: PubMed Central journal article supplement — Mol Ther. 2020 Sep 5;29(1):308–23. doi: 10.1016/j.ymthe.2020.09.002 (PMC7791010; doi:10.1016/j.ymthe.2020.09.002), 2020-09-05
Supplement: mmc1.pdf [file mmc1.pdf]

## **Supplemental Information**

### **Circular RNA circPDE4D Protects against Osteoarthritis by Binding to miR-103a-3p and Regulating FGF18**

**Yizheng Wu, Zhenghua Hong, Wenbin Xu, Junxin Chen, Qingxin Wang, Jiaxin Chen, Weiyu Ni, Zixuan Mei, Ziang Xie, Yan Ma, Jiying Wang, Jianhong Lu, Chao Chen, Shunwu Fan, and Shuying Shen**

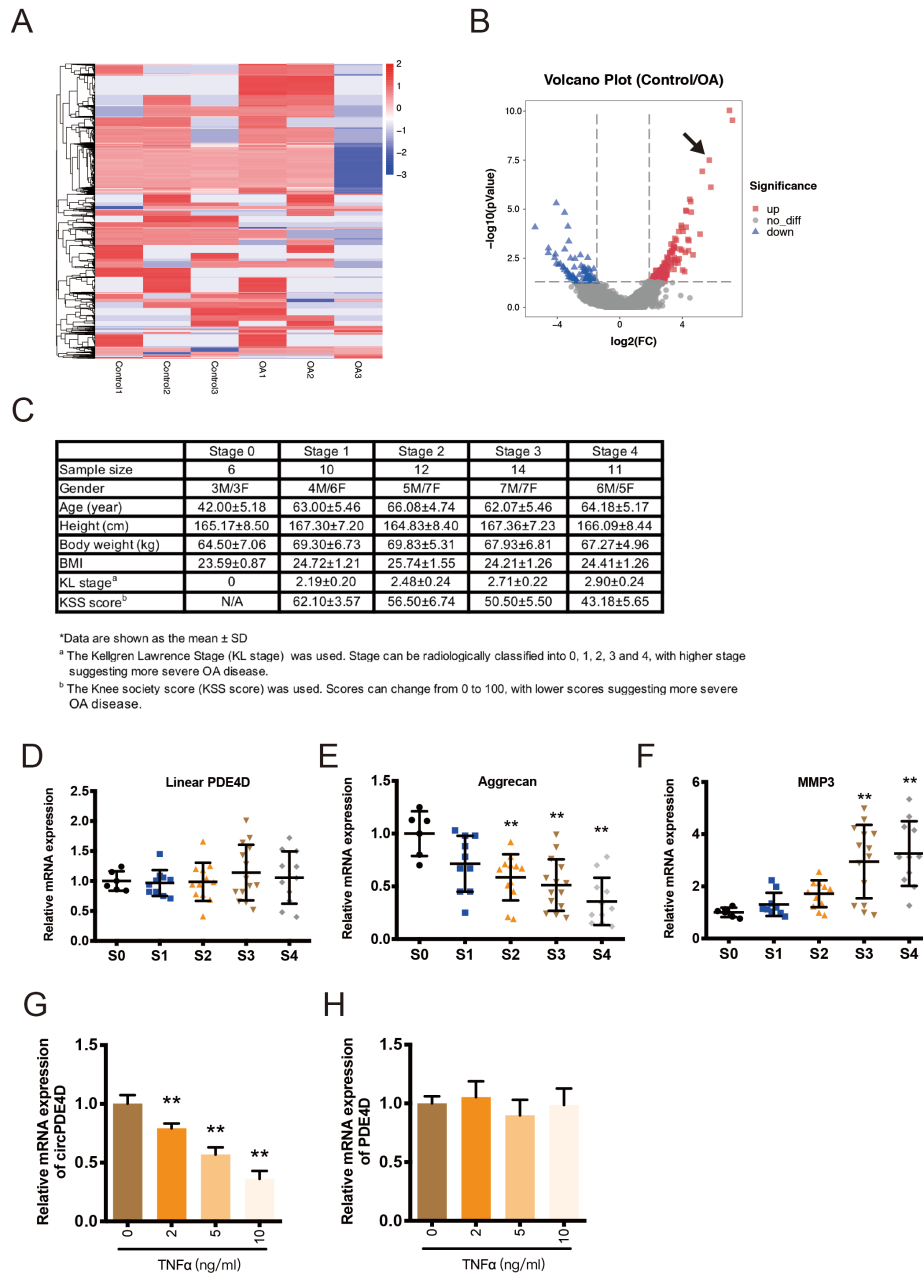

### Supplementary Figure 1. Information on clinical cartilage specimens.

(A-B) Heatmap (A) and corresponding volcano plot (B) of differentially expressed circRNAs between control and OA cartilage specimens from our previous study. circPDE4D is indicated by a black arrow. The raw data are available on the NCBI SRA database (SRA accession number: PRJNA516555). (C) Information on the human specimens, including size, gender, age, height, body weight, BMI, KL stage and KSS score. (D-F) Expression of linear PDE4D, Aggrecan and MMP3 in 53 human cartilage specimens obtained by qRT-PCR analysis. (G-H) The expression of circPDE4D and linear PDE4D in human primary chondrocytes (HCs) stimulated with TNF $\alpha$  at concentrations of 0, 2, 5, or 10 ng/ml for 24 h was determined by qRT-PCR. The data were obtained from three independent donors (presented as the means  $\pm$  SDs) (G-H) (\*P<0.05 and \*\*P<0.01 vs the control or indicated group). The data were analyzed by one-way ANOVA followed by the Bonferroni test (D-F) or two-tailed t-tests (G-H).

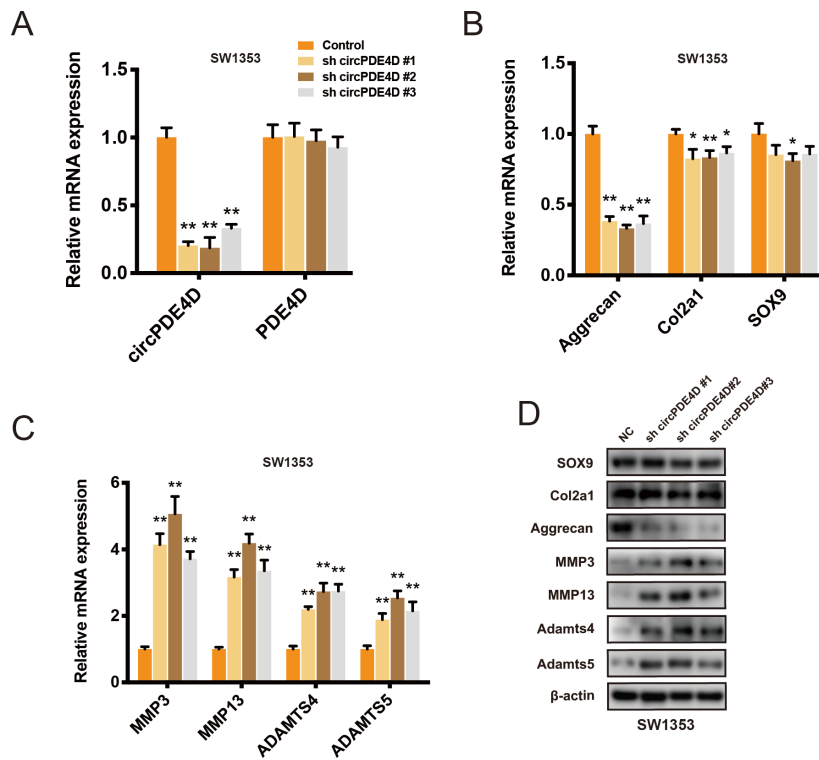

**Supplementary Figure 2. The knockdown of circPDE4D induces matrix degradation in SW1353 cells.**

(A) SW1353 cells were transfected with sh-circPDE4D #1, #2, #3 or NC and then used for qRT-PCR analysis. The histogram demonstrates the changes in the expression of circPDE4D and linear PDE4D. (B-C) SW1353 cells were stably transfected with sh-circPDE4D #1, #2, #3 or negative control, and the expression of Col2a1, Aggrecan, SOX9, MMP3, MMP13, ADAMTS4, and ADAMTS5 was evaluated by qRT-PCR. (D) The protein levels of SOX9, Col2a1, Aggrecan, MMP3, MMP13, ADAMTS4, and ADAMTS5 in stable SW1353 cells were evaluated by Western blotting. The data were obtained from three independent experiments (presented as the means  $\pm$  SDs) (A-C) or were representative of three independent experiments with similar results (D). (\* $P < 0.05$  and \*\* $P < 0.01$  vs the control or indicated group) The data were analyzed by two-tailed t-tests (A-C).

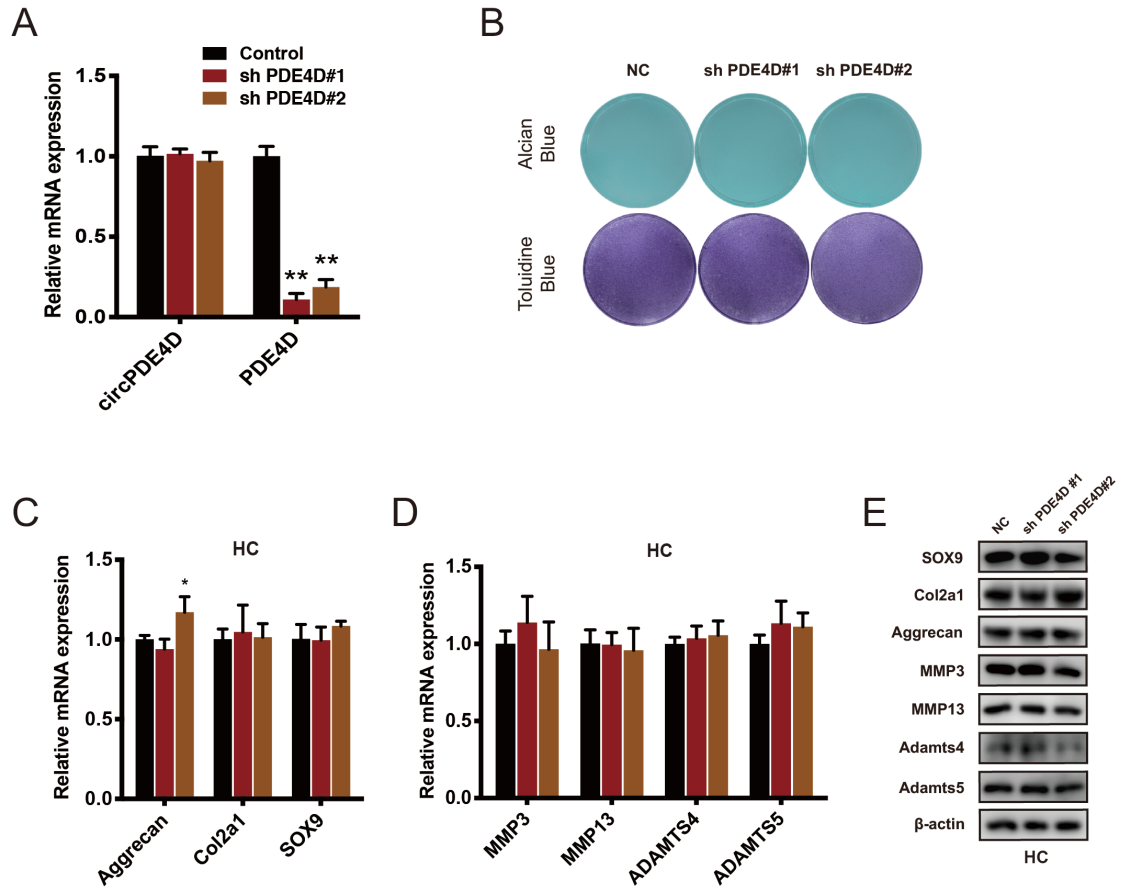

**Supplementary Figure 3. Linear PDE4D is not related to matrix degradation.**

(A) HCs were stably transfected with sh-PDE4D #1, #2 or negative control. The histogram demonstrates the changes in the expression of circPDE4D and PDE4D. (B) The accumulation of proteoglycans was measured by Alcian blue and toluidine blue staining. (C-E) The expression of Col2a1, Aggrecan, SOX9, MMP3, MMP13, ADAMTS4, and ADAMTS5 at the mRNA and protein levels in HCs was evaluated by qRT-PCR and Western blotting. The data were obtained from three independent donors (presented as the means  $\pm$  SDs) (A, C and D) or were representative of three independent experiments with similar results (B and E). (\* $P < 0.05$  and \*\* $P < 0.01$  vs the control or indicated group) The data were analyzed by two-tailed t-tests (A, C and D).

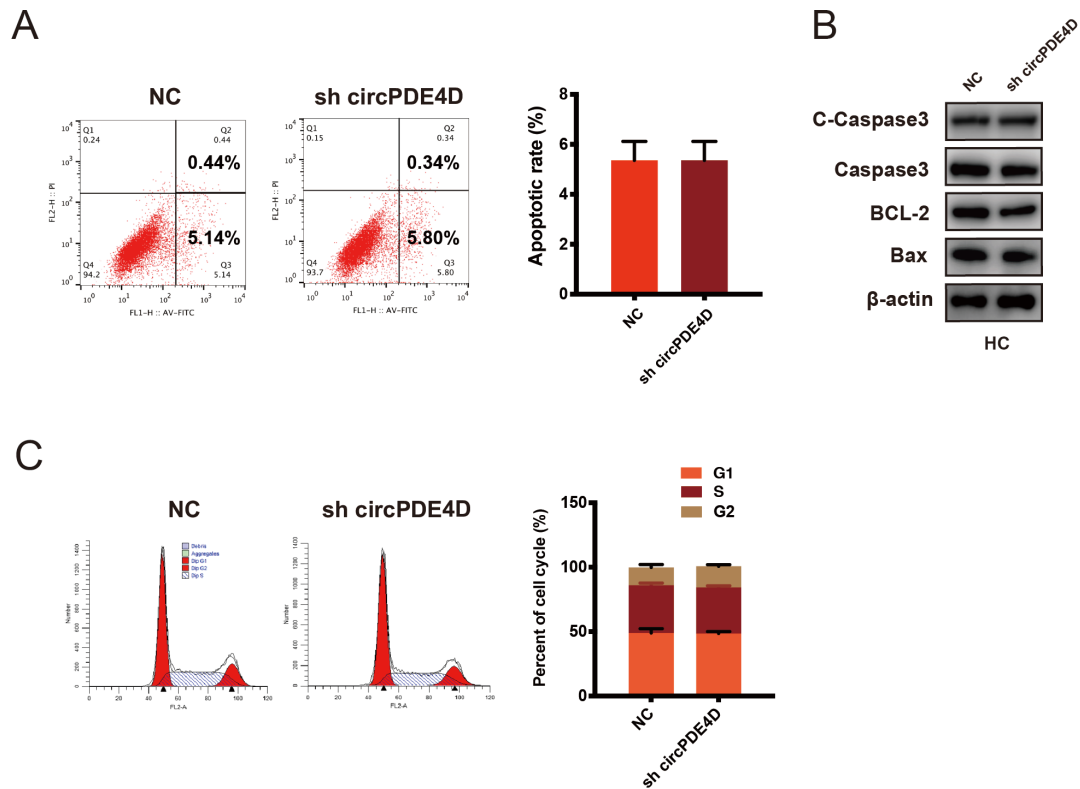

**Supplementary Figure 4. circPDE4D is not related to apoptosis or the cell cycle.** (A) Stable HCs were collected, stained with Annexin V-FITC and PI, and subjected to flow cytometry detection. Representative images and histograms are shown. (B) The expression of apoptosis-associated proteins (cleaved-Caspase 3, Caspase 3, BCL-2 and Bax) was evaluated by Western blotting. (C) The proportions of circPDE4D-knockdown HCs and their matched control cells at different phases of the cell cycle (G1, S and G2) were evaluated by flow cytometry. The data were obtained from three independent experiments with three independent donors (presented as the means  $\pm$  SDs) (A and C) or were representative of three independent experiments with similar results (B). (\* $P < 0.05$  and \*\* $P < 0.01$  vs the control or indicated group). The data were analyzed by two-tailed t-tests (A and C).

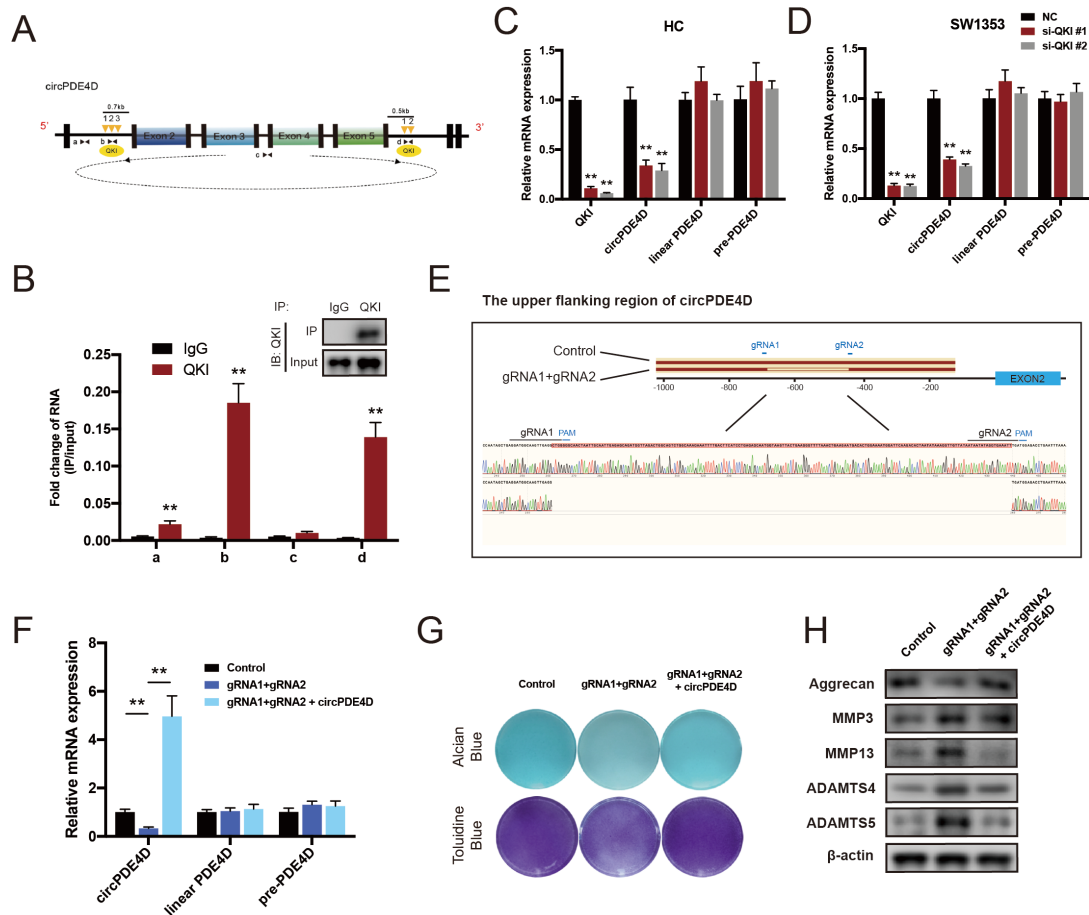

**Supplementary Figure 5. Blocking the circPDE4D signal induces OA phenotypes in SW1353 cells.**

(A) Schematic diagram of QKI response elements (QREs) in the flanking regions of circPDE4D. a, b, c and d respectively represent the primers in the remote region, upperstream flanking, splicing junction and downstream flanking region of circPDE4D. (B) The corresponding mRNAs in (A) were pulled by QKI and IgG and detected by RNA immunoprecipitation assay followed by qRT-PCR. (C-D) The relative mRNA levels of circPDE4D, linear PDE4D and pre-PDE4D after QKI knockdown were detected by qRT-PCR. (E) Sanger sequencing confirming the gene editing in the upper flanking region containing all the QREs by CRISPR/Cas9. (F) qRT-PCR indicated the expression of circPDE4D, linear PDE4D and pre-PDE4D after CRISPR/Cas9 or co-overexpression of circPDE4D. (G) Alcian blue and toluidine blue staining in the corresponding treatments were measured in SW1353. (H) The protein levels of Aggrecan, MMP3, MMP13, ADAMTS4 and ADAMTS5 were evaluated by Western blotting. The data were obtained from three independent experiments (presented as the means  $\pm$  SDs) (B-D and F) or were representative of three independent experiments with similar results (G and H). (\* $P < 0.05$  and \*\* $P < 0.01$  vs the control or indicated group). The data were analyzed by two-tailed t-tests (B-D and F).

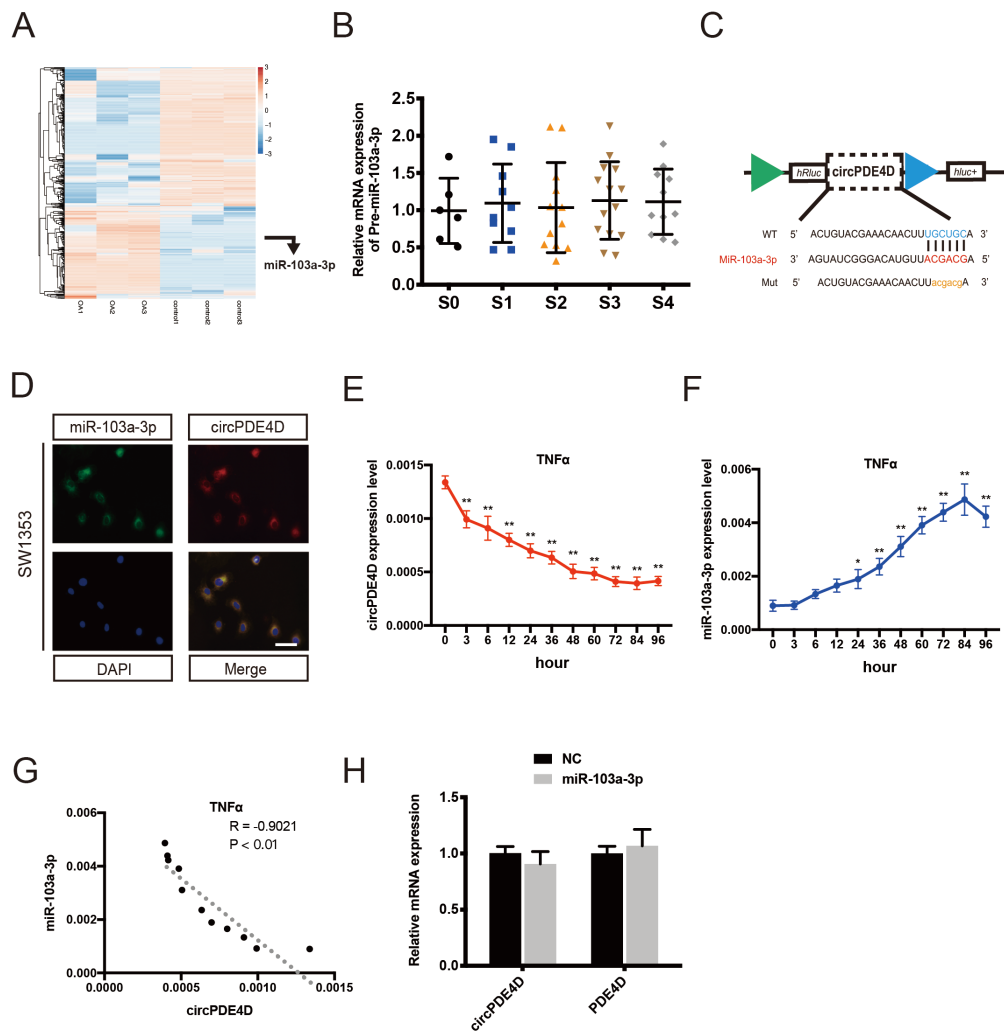

### Supplementary Figure 6. miR-103a-3p expression and the correlation analysis.

(A) miRNA sequencing of OA and normal cartilage specimens in our previously reported study. The raw data can be found at the NCBI SRA database (SRA accession number: PRJNA516556). (B) Abundances of pre-miR-103a-3p in clinical cartilage tissues. (C) Schematic illustration demonstrating the complementary miR-103a-3p seed sequence with circPDE4D. Lower letters indicate mutated nucleotides. (D) FISH images showing the colocalization of circPDE4D and miR-103a-3p in SW1353 cells. miR-103a-3p probes were labeled with Alexa Fluor 488. The circPDE4D probes were labeled with CY3. Nuclei were stained with DAPI. Scale bar: 20  $\mu\text{m}$ . (E-F) Expression of circPDE4D (normalized to  $\beta$ -actin) and miR-103-3p (normalized to U6) after TNF $\alpha$  stimulation for different time points. (G) Pearson correlation analysis of circPDE4D and miR-103a-3p after TNF $\alpha$  stimulation for different time points (Pearson  $r = -0.9021$ ;  $P < 0.01$ ). (H) The mRNA expression of circPDE4D and PDE4D after miR-103a-3p overexpression was detected by qRT-PCR. The data were obtained from three independent experiments with three independent donors (presented as the means  $\pm$  SDs) (E, F and H) or were representative of three independent experiments with similar results (D). (\* $P < 0.05$  and \*\* $P < 0.01$  vs the control or indicated group). The data were analyzed by one-way ANOVA followed by the Bonferroni test (B, E and F) or two-tailed t-test (H).

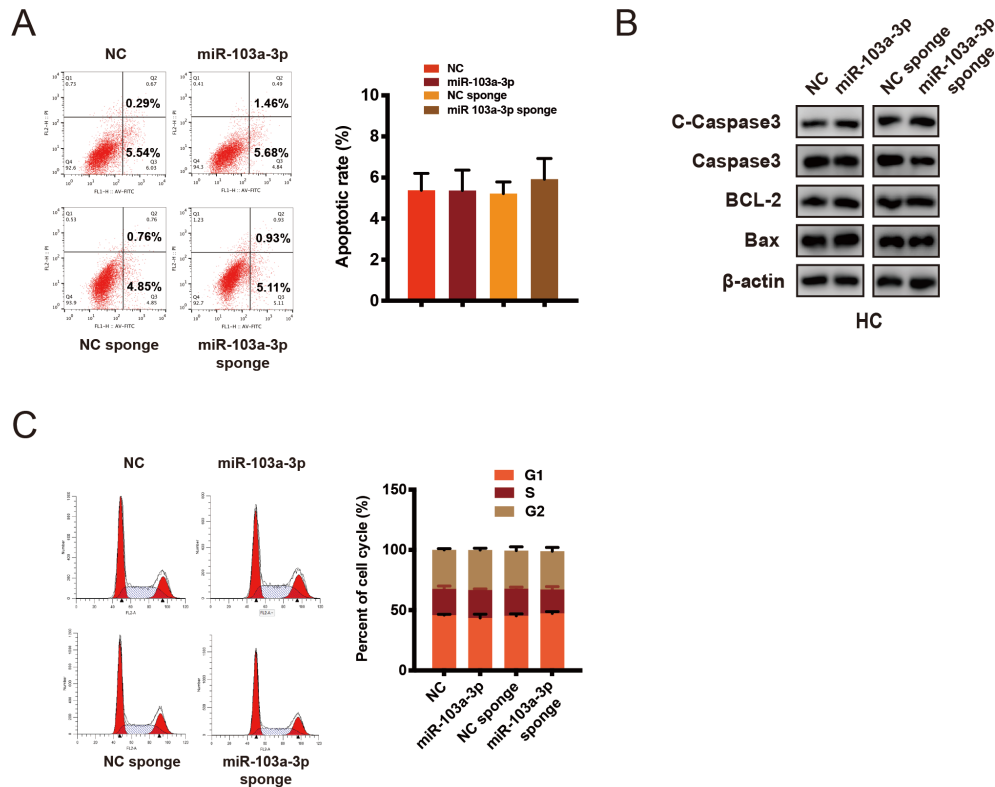

**Supplementary Figure 7. miR-103a-3p is not related to apoptosis or the cell cycle.**

(A) HCs were transfected with miR-103a-3p, miR-103a-3p sponge or its negative control, stained with Annexin V-FITC and PI, and then subjected to flow cytometry detection. Representative images and histograms are shown. (B) The expression of apoptosis-associated proteins (cleaved-Caspase 3, Caspase 3, BCL-2 and Bax) was evaluated by Western blotting. (C) The proportions of cells at different cell cycle phases were evaluated by flow cytometry. The data were obtained from three independent experiments with three independent donors (presented as the means  $\pm$  SDs) (A and C) or were representative of three independent experiments with similar results (B). (\* $P < 0.05$  and \*\* $P < 0.01$  vs the control or indicated group). The data were analyzed by two-tailed t-tests (A and C).



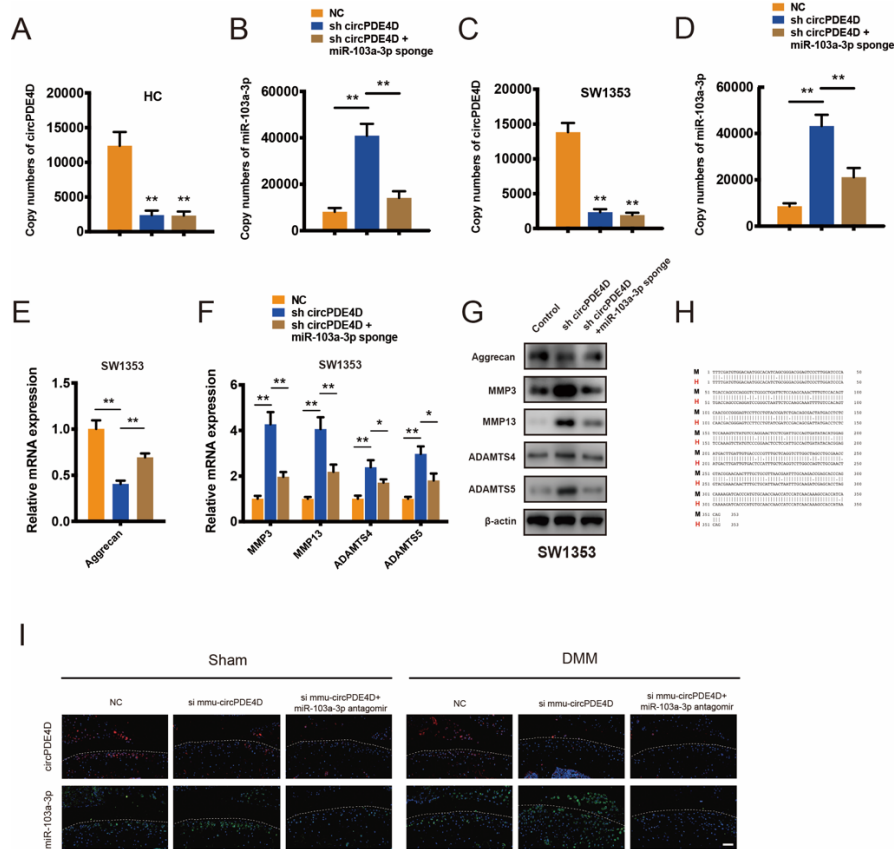

### Supplementary Figure 8. miR-103a-3p reverses sh-circPDE4D-induced matrix degradation.

(A-B) HCs were stably transfected with empty vector (NC) or sh-circPDE4D or cotransfected with both sh-circPDE4D and miR-103a-3p sponge. The expression of circPDE4D and miR-103a-3p in HCs was evaluated by qRT-PCR.  $\beta$ -actin was used as an internal reference for mRNA, and U6 was used as an internal reference for miRNA. (C-D) SW1353 cells were stably transfected with empty vector (NC) or sh-circPDE4D or cotransfected with both sh-circPDE4D and miR-103a-3p sponge. The mRNA levels of circPDE4D and miR-103a-3p are shown in the histograms. (E-F) The mRNA expression of Aggrecan, MMP3, MMP13, ADAMTS4, and ADAMTS5 was evaluated by qRT-PCR. (G) The protein expression of Aggrecan and MMP3, MMP13, ADAMTS4, and ADAMTS5 was determined by Western blotting. (H) Sequence alignment of human circPDE4D (H) and the mouse circPDE4D homolog (M). (I) The expression of circPDE4D and miR-103a-3p in mouse cartilage was detected by FISH. miR-103a-3p probes were labeled with Alexa Fluor 488. Mmu-circPDE4D probes were labeled with CY3. Nuclei were stained with DAPI. Scale bar: 50  $\mu$ m. The data were obtained from three independent experiments (presented as the means  $\pm$  SDs) (A-F) or were representative of three independent experiments with similar results (G and I). (\* $P < 0.05$  and \*\* $P < 0.01$  vs the control or indicated group) The data were analyzed by two-tailed t-tests (A-F).

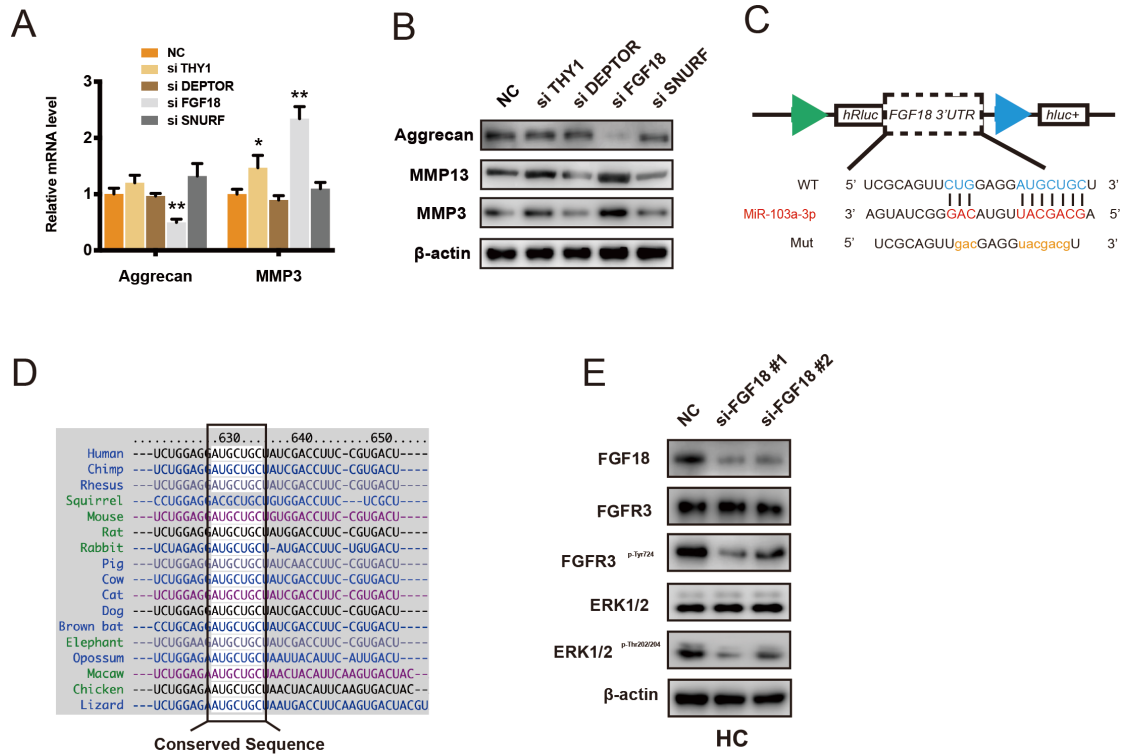

**Supplementary Figure 9. FGF18 functions downstream of miR-103a-3p and plays a protective role in OA development.**

(A) HCs were transfected with si-THY1, si-DEPTOR, si-FGF18, si-SNURF or negative control, and the changes in Aggrecan and MMP3 expression were evaluated by qRT-PCR. (B) Protein expression of Aggrecan, MMP3 and MMP13 after the knockdown of THY, DEPTOR, FGF18 or SNURF. (C) Schematic illustration demonstrating the complementary miR-103a-3p seed sequence with the FGF18 3'UTR. Lowercase letters indicate mutated nucleotides. (D) Sequence alignment of a putative miR-103a-3p-binding site within the 3'UTR of FGF18 mRNA revealed a high level of sequence conservation and complementarity with miR-103a-3p across vertebrates. (E) The protein expression of FGF18 and its downstream genes, including FGFR3, FGFR3<sup>p-Tyr724</sup>, ERK1/2, and ERK1/2<sup>p-Thr202/204</sup>, was determined by Western blotting. The data were obtained from three independent experiments with three independent donors (presented as the means  $\pm$  SDs) (A) or were representative of three independent experiments with similar results (B and E). (\* $P < 0.05$  and \*\* $P < 0.01$  vs the control or indicated group) The data were analyzed by two-tailed t-tests (A).



Supplemental Table 1 The information of patients

| 6 clinical cartilage tissues at stage 0  |            |             |             |       |          |           |
|------------------------------------------|------------|-------------|-------------|-------|----------|-----------|
| Gender                                   | Age (year) | Height (cm) | Weight (kg) | BMI   | KL stage | KSS score |
| Female                                   | 40         | 155         | 54          | 22.48 | 0        | N/A       |
| Male                                     | 42         | 173         | 69          | 23.05 | 0        | N/A       |
| Female                                   | 48         | 157         | 58          | 23.53 | 0        | N/A       |
| Female                                   | 35         | 161         | 65          | 25.08 | 0        | N/A       |
| Male                                     | 39         | 171         | 69          | 23.60 | 0        | N/A       |
| Male                                     | 48         | 174         | 72          | 23.78 | 0        | N/A       |
| 10 clinical cartilage tissues at stage 1 |            |             |             |       |          |           |
| Gender                                   | Age (year) | Height (cm) | Weight (kg) | BMI   | KL stage | KSS score |
| Male                                     | 63         | 176         | 76          | 24.54 | 2.3      | 66        |
| Male                                     | 68         | 179         | 82          | 25.59 | 1.9      | 65        |
| Male                                     | 70         | 170         | 68          | 23.53 | 2.5      | 67        |
| Female                                   | 59         | 162         | 67          | 25.53 | 2.1      | 57        |
| Female                                   | 59         | 162         | 69          | 26.29 | 2.2      | 65        |
| Male                                     | 73         | 175         | 72          | 23.51 | 2.3      | 61        |
| Female                                   | 59         | 158         | 59          | 23.63 | 2.2      | 62        |
| Female                                   | 62         | 165         | 72          | 26.45 | 2.4      | 57        |
| Female                                   | 57         | 162         | 61          | 23.24 | 1.9      | 61        |
| Female                                   | 60         | 164         | 67          | 24.91 | 2.1      | 60        |
| 12 clinical cartilage tissues at stage 2 |            |             |             |       |          |           |
| Gender                                   | Age (year) | Height (cm) | Weight (kg) | BMI   | KL stage | KSS score |
| Male                                     | 69         | 167         | 71          | 25.46 | 2.5      | 56        |
| Male                                     | 72         | 175         | 76          | 24.82 | 2.1      | 60        |
| Female                                   | 73         | 165         | 68          | 24.98 | 2.5      | 43        |
| Female                                   | 65         | 158         | 69          | 27.64 | 2.7      | 59        |
| Female                                   | 63         | 157         | 62          | 25.15 | 2.1      | 68        |
| Male                                     | 66         | 179         | 81          | 25.28 | 2.9      | 61        |
| Female                                   | 71         | 155         | 66          | 27.47 | 2.3      | 63        |
| Male                                     | 58         | 174         | 69          | 22.79 | 2.7      | 51        |
| Female                                   | 59         | 161         | 73          | 28.16 | 2.6      | 53        |
| Male                                     | 66         | 172         | 72          | 24.34 | 2.5      | 50        |
| Female                                   | 64         | 156         | 63          | 25.89 | 2.3      | 54        |
| Female                                   | 67         | 159         | 68          | 26.90 | 2.6      | 60        |
| 14 clinical cartilage tissues at stage 3 |            |             |             |       |          |           |
| Gender                                   | Age (year) | Height (cm) | Weight (kg) | BMI   | KL stage | KSS score |
| Male                                     | 59         | 176         | 70          | 22.60 | 2.7      | 48        |
| Male                                     | 62         | 172         | 72          | 24.34 | 2.6      | 59        |
| Male                                     | 69         | 181         | 80          | 24.42 | 2.7      | 59        |
| Female                                   | 64         | 159         | 62          | 24.52 | 2.9      | 52        |
| Female                                   | 70         | 166         | 67          | 24.31 | 2.9      | 44        |

|        |    |     |    |       |     |    |
|--------|----|-----|----|-------|-----|----|
| Male   | 57 | 172 | 72 | 24.34 | 3.1 | 45 |
| Female | 54 | 162 | 71 | 27.05 | 3.1 | 49 |
| Male   | 66 | 175 | 79 | 25.80 | 2.4 | 53 |
| Female | 55 | 164 | 62 | 23.05 | 2.7 | 45 |
| Male   | 61 | 168 | 69 | 24.45 | 2.4 | 48 |
| Female | 67 | 164 | 59 | 21.94 | 2.5 | 49 |
| Male   | 58 | 168 | 67 | 23.74 | 2.7 | 45 |
| Female | 69 | 161 | 64 | 24.69 | 2.6 | 60 |
| Female | 58 | 155 | 57 | 23.73 | 2.6 | 51 |

11 clinical cartilage tissues at stage 4

| Gender | Age (year) | Height (cm) | Weight (kg) | BMI   | KL stage | KSS score |
|--------|------------|-------------|-------------|-------|----------|-----------|
| Female | 66         | 155         | 59          | 24.56 | 3.2      | 41        |
| Male   | 69         | 167         | 67          | 24.02 | 2.9      | 37        |
| Male   | 71         | 169         | 66          | 23.11 | 3.1      | 45        |
| Female | 67         | 158         | 63          | 25.24 | 2.6      | 38        |
| Male   | 69         | 176         | 69          | 22.28 | 2.8      | 37        |
| Male   | 62         | 174         | 75          | 24.77 | 3.2      | 49        |
| Female | 61         | 160         | 65          | 25.39 | 2.9      | 49        |
| Male   | 55         | 177         | 71          | 22.66 | 2.7      | 52        |
| Female | 67         | 154         | 62          | 26.14 | 2.9      | 37        |
| Female | 62         | 164         | 69          | 25.65 | 2.5      | 42        |
| Male   | 57         | 173         | 74          | 24.73 | 3.1      | 48        |

Other cartilage tissues used for primary chondrocytes culture

| Gender | Age (year) | Height (cm) | Weight (kg) | BMI   | KL stage | KSS score |
|--------|------------|-------------|-------------|-------|----------|-----------|
| Male   | 57         | 175         | 75          | 24.49 | 2.1      | 63        |
| Male   | 62         | 174         | 73          | 24.11 | 2.4      | 58        |
| Male   | 67         | 172         | 73          | 24.68 | 2.6      | 58        |
| Female | 64         | 162         | 62          | 23.62 | 2.7      | 54        |
| Female | 59         | 158         | 62          | 24.84 | 2.2      | 62        |
| Male   | 62         | 174         | 69          | 22.79 | 2.8      | 49        |
| Female | 66         | 168         | 63          | 22.32 | 2.7      | 54        |
| Male   | 65         | 165         | 60          | 22.04 | 2.5      | 55        |
| Female | 61         | 156         | 58          | 23.83 | 2.3      | 59        |
